# Supplementary material for: Sources Identification of Nitrogen Using Major Ions and Isotopic Tracers in Shenyang, China
Source: Hindawi journal article supplement (doi:10.1155/2018/8683904), 2018-08-23
Supplement: f1 [file 8683904.f1.pdf]

### **Supplementary material**

The original data of Table 2 are listed in Table S1.

The original data of Table 3 are listed in Table S2.

The original data of Table 4 are listed in Table S3 for the dry season and in Table S4 for the wet season.

The original data of Table 5 are listed in Table S5 for the dry season and in Table S6 for the wet season.

The  $\delta^{15}\text{N}_{\text{nitrate}}$  and  $\delta^{18}\text{O}_{\text{nitrate}}$  values for soil samples are listed in Table S7.

**Table S1 Hydrochemical data in the Shenyang Areas, March 2011**

| <b>Point Name</b> | <b>Ec</b> | <b>pH</b> | <b>Ca</b> | <b>Mg</b> | <b>Cl</b> | <b>HCO<sub>3</sub></b> | <b>NH<sub>4</sub></b> | <b>Fe</b> | <b>Na</b> | <b>K</b> | <b>SO<sub>4</sub></b> | <b>NO<sub>3</sub></b> | <b>Mn</b> |
|-------------------|-----------|-----------|-----------|-----------|-----------|------------------------|-----------------------|-----------|-----------|----------|-----------------------|-----------------------|-----------|
| <b>BH04</b>       | 522.70    | 6.45      | 35.00     | 16.00     | 30.00     | 171.09                 | 12.11                 | 4.16      | 32.56     | 4.64     | 64.10                 | 1.46                  | 0.91      |
| <b>BH06</b>       | 511.50    | 6.73      | 36.00     | 16.00     | 39.00     | 155.99                 | 10.59                 | 2.07      | 31.55     | 5.86     | 55.69                 | 2.17                  | 0.87      |
| <b>BH07</b>       | 517.90    | 7.06      | 37.00     | 13.00     | 37.00     | 130.84                 | 9.94                  | 3.89      | 29.92     | 5.52     | 72.04                 | 4.60                  | 0.95      |
| <b>HH01</b>       | 883.60    | 7.60      | 70.00     | 27.00     | 106.00    | 193.74                 | 9.54                  | 1.12      | 57.49     | 5.82     | 113.78                | 9.30                  | <0.05     |
| <b>HH02</b>       | 882.10    | 8.11      | 83.00     | 23.00     | 114.00    | 213.87                 | 7.91                  | 1.08      | 58.13     | 6.24     | 125.73                | 9.61                  | 0.15      |
| <b>HH03</b>       | 881.90    | 8.07      | 83.00     | 22.00     | 102.00    | 178.65                 | 7.84                  | 1.75      | 58.62     | 6.12     | 125.38                | 9.56                  | 0.13      |
| <b>HH05</b>       | 974.50    | 7.82      | 79.00     | 32.00     | 103.00    | 228.97                 | 10.86                 | 4.93      | 66.89     | 7.02     | 150.03                | 9.70                  | 2.29      |
| <b>HH09</b>       | 989.60    | 7.80      | 87.00     | 23.00     | 114.00    | 191.22                 | 12.60                 | 1.20      | 70.70     | 8.36     | 137.20                | 7.88                  | 0.27      |
| <b>XH01</b>       | 1555.00   | 7.14      | 91.00     | 24.00     | 222.00    | 266.71                 | 23.18                 | 1.23      | 158.40    | 8.36     | 139.82                | 7.13                  | 0.27      |
| <b>XH04</b>       | 1652.00   | 7.18      | 76.00     | 22.00     | 271.00    | 246.57                 | 22.67                 | 1.00      | 175.40    | 8.48     | 118.22                | 18.02                 | 0.27      |
| <b>ZK02</b>       | 1783.00   | 6.45      | 147.00    | 58.00     | 172.00    | 135.86                 | 0.13                  | 23.86     | 93.13     | 4.40     | 172.12                | 401.02                | 0.45      |
| <b>ZK03</b>       | 1283.00   | 6.67      | 111.00    | 44.00     | 121.00    | 72.96                  | 0.03                  | 1.16      | 83.79     | 3.37     | 172.77                | 221.16                | <0.05     |
| <b>ZK04</b>       | 755.00    | 6.88      | 34.00     | 32.00     | 77.00     | 211.35                 | 0.99                  | 5.16      | 61.59     | 3.48     | 69.99                 | 4.16                  | 1.24      |
| <b>ZK06</b>       | 650.60    | 5.94      | 55.00     | 23.00     | 53.00     | 70.45                  | 0.03                  | 2.53      | 39.17     | 3.94     | 114.63                | 73.75                 | 1.90      |
| <b>LG11-2</b>     | 665.40    | 6.83      | 65.00     | 20.00     | 58.00     | 173.61                 | 0.66                  | 1.60      | 48.45     | 2.97     | 85.65                 | 5.14                  | 1.11      |
| <b>LG12-1</b>     | 592.00    | 7.40      | 71.00     | 16.00     | 51.00     | 196.26                 | 0.03                  | 0.32      | 51.99     | 2.61     | 90.02                 | 5.76                  | 0.93      |
| <b>LG12-2</b>     | 575.00    | 7.31      | 66.00     | 18.00     | 58.00     | 198.77                 | 0.05                  | 0.36      | 51.80     | 2.97     | 89.55                 | 1.15                  | 1.51      |
| <b>LG15</b>       | 719.30    | 6.63      | 59.00     | 21.00     | 50.00     | 223.93                 | 6.35                  | 0.79      | 48.78     | 4.42     | 86.12                 | 1.42                  | 1.67      |
| <b>LG17</b>       | 653.00    | 7.21      | 72.00     | 35.00     | 69.00     | 171.09                 | 0.03                  | 0.27      | 42.13     | 3.07     | 107.15                | 42.14                 | 0.85      |
| <b>LG18</b>       | 592.00    | 7.21      | 71.00     | 19.00     | 53.00     | 188.71                 | 0.03                  | 0.94      | 44.74     | 2.84     | 93.97                 | 15.85                 | 0.75      |
| <b>LG20</b>       | 582.00    | 7.38      | 63.00     | 14.00     | 58.00     | 186.20                 | 1.66                  | 0.07      | 51.56     | 3.89     | 79.63                 | 2.70                  | 2.46      |
| <b>LG2-1</b>      | 760.30    | 6.85      | 69.00     | 27.00     | 83.00     | 166.03                 | 0.58                  | 2.58      | 41.26     | 2.63     | 89.54                 | 29.13                 | 2.33      |
| <b>LG24</b>       | 600.00    | 7.32      | 67.00     | 17.00     | 60.00     | 206.31                 | 0.25                  | 0.06      | 54.33     | 2.92     | 90.51                 | 6.51                  | 2.03      |

|               |         |      |        |       |        |        |      |       |        |      |        |        |       |
|---------------|---------|------|--------|-------|--------|--------|------|-------|--------|------|--------|--------|-------|
| <b>LG3-1</b>  | 798.70  | 6.46 | 57.00  | 43.00 | 93.00  | 150.93 | 0.12 | 3.42  | 41.34  | 2.32 | 91.75  | 43.56  | 2.13  |
| <b>LG33</b>   | 543.00  | 7.37 | 55.00  | 23.00 | 52.00  | 193.74 | 0.03 | 0.07  | 52.74  | 2.49 | 92.80  | 1.37   | 1.14  |
| <b>LG36-b</b> | 530.20  | 8.48 | 38.00  | 19.00 | 55.00  | 213.87 | 8.78 | 12.92 | 38.87  | 4.80 | 12.50  | 0.84   | 0.63  |
| <b>LG39</b>   | 1152.00 | 6.28 | 134.00 | 25.00 | 157.00 | 236.47 | 0.03 | 0.17  | 50.69  | 2.48 | 131.40 | 13.55  | 4.04  |
| <b>LG4-1</b>  | 733.40  | 6.38 | 76.00  | 23.00 | 86.00  | 143.39 | 0.03 | 0.19  | 33.43  | 2.24 | 75.98  | 37.67  | 1.76  |
| <b>LG42-2</b> | 540.00  | 7.39 | 48.00  | 23.00 | 55.00  | 176.12 | 2.00 | 0.09  | 51.77  | 3.39 | 89.39  | 0.84   | 1.33  |
| <b>LG44</b>   | 715.10  | 7.04 | 68.00  | 23.00 | 54.00  | 259.16 | 0.45 | 0.41  | 58.15  | 2.76 | 84.43  | 0.71   | 1.27  |
| <b>LG5-2</b>  | 778.90  | 6.36 | 57.00  | 47.00 | 95.00  | 155.97 | 0.03 | 0.25  | 46.70  | 2.44 | 97.64  | 43.91  | 2.19  |
| <b>LG6-2</b>  | 722.60  | 6.58 | 63.00  | 27.00 | 68.00  | 191.18 | 0.09 | 1.31  | 50.72  | 2.91 | 95.29  | 10.93  | 1.12  |
| <b>LG8-1</b>  | 625.00  | 7.39 | 79.00  | 18.00 | 64.00  | 216.39 | 2.23 | 0.15  | 49.03  | 4.00 | 77.00  | 1.68   | 1.33  |
| <b>LG8-2</b>  | 562.00  | 7.41 | 62.00  | 20.00 | 57.00  | 173.61 | 0.57 | 0.21  | 47.48  | 3.21 | 85.17  | 2.75   | 1.34  |
| <b>LG22</b>   | 616.30  | 6.89 | 61.00  | 16.00 | 57.00  | 203.80 | 0.50 | 0.37  | 51.11  | 2.77 | 83.08  | 0.80   | 1.20  |
| <b>LG43</b>   | 691.50  | 6.46 | 79.00  | 23.00 | 52.00  | 244.06 | 0.64 | 0.46  | 31.62  | 3.02 | 87.12  | 0.84   | 1.73  |
| <b>MJ09</b>   | 1060.00 | 6.23 | 105.00 | 41.00 | 145.00 | 110.71 | 0.03 | 0.09  | 47.76  | 3.02 | 125.04 | 80.61  | <0.05 |
| <b>MJ-1</b>   | 1356.00 | 6.55 | 106.00 | 50.00 | 136.00 | 221.37 | 0.68 | 0.13  | 85.04  | 6.12 | 127.21 | 209.38 | 3.06  |
| <b>MJ11</b>   | 1451.00 | 6.53 | 152.00 | 47.00 | 126.00 | 90.58  | 0.03 | 1.34  | 69.68  | 6.92 | 199.25 | 316.51 | 1.88  |
| <b>MJ12</b>   | 1438.00 | 6.36 | 152.00 | 22.00 | 204.00 | 105.67 | 0.03 | 0.54  | 113.90 | 3.49 | 201.07 | 135.55 | <0.05 |
| <b>MJ17</b>   | 1318.00 | 6.18 | 77.00  | 76.00 | 151.00 | 221.42 | 0.34 | 0.26  | 84.60  | 5.42 | 197.46 | 89.60  | 1.72  |
| <b>MJ18</b>   | 1327.00 | 6.35 | 46.00  | 85.00 | 171.00 | 201.29 | 0.03 | 0.25  | 84.48  | 5.36 | 195.79 | 30.06  | 2.31  |
| <b>MJ19</b>   | 1035.00 | 6.93 | 111.00 | 1.00  | 83.00  | 98.13  | 0.03 | 1.67  | 70.83  | 5.64 | 154.47 | 76.27  | 0.15  |
| <b>MJ20</b>   | 1262.00 | 6.75 | 128.00 | 18.00 | 96.00  | 161.03 | 0.03 | 1.48  | 87.60  | 4.36 | 176.87 | 218.59 | <0.05 |
| <b>MJ21</b>   | 1466.00 | 6.51 | 119.00 | 35.00 | 157.00 | 176.12 | 0.03 | 1.18  | 112.20 | 5.08 | 174.46 | 202.52 | 0.21  |

**Table S2 Hydrochemical data in the Shenyang Areas, June 2011**

| Point Name | EC(us/cm) | pH-feild | pH-indoor | Na    | K    | Ca     | Mg    | NH <sub>4</sub> | Fe   | HCO <sub>3</sub> | Cl     | SO <sub>4</sub> | NO <sub>3</sub> | Mn    |
|------------|-----------|----------|-----------|-------|------|--------|-------|-----------------|------|------------------|--------|-----------------|-----------------|-------|
| BH01       | 656.10    | 7.06     | 6.84      | 52.86 | 4.25 | 64.14  | 15.94 | 0.06            | 1.62 | 216.88           | 57.02  | 99.63           | 5.36            | 3.14  |
| BH02       | 595.60    | 6.89     | 6.83      | 46.19 | 2.80 | 64.50  | 16.50 | 0.06            | 2.07 | 203.49           | 50.20  | 99.35           | 18.41           | 1.55  |
| BH03       | 672.00    | 7.01     | 7.03      | 51.99 | 3.45 | 68.15  | 16.65 | 0.16            | 0.94 | 222.24           | 55.21  | 104.69          | 4.08            | 0.93  |
| BH04       | 572.60    | 7.20     | 7.12      | 31.18 | 5.24 | 48.99  | 14.37 | 10.71           | 3.43 | 200.82           | 42.40  | 75.98           | 4.22            | 1.90  |
| BH04-B     | 561.00    | 7.32     | 6.62      | 33.66 | 6.05 | 47.65  | 15.59 | 0.06            | 6.49 | 149.90           | 46.03  | 92.39           | 10.17           | 2.56  |
| BH04-C     | 540.40    | 7.36     | 6.88      | 35.06 | 5.15 | 38.48  | 12.48 | 9.11            | 2.86 | 160.70           | 42.69  | 77.95           | 3.00            | 10.29 |
| BH05       | 639.60    | 6.99     | 7.11      | 47.21 | 3.99 | 62.54  | 16.03 | 0.13            | 0.58 | 208.80           | 50.08  | 95.10           | 9.82            | 1.39  |
| BH06       | 617.00    | 7.03     | 7.03      | 45.69 | 4.29 | 59.48  | 15.56 | 0.16            | 2.57 | 208.85           | 48.59  | 91.05           | 10.62           | 3.17  |
| BH07       | 596.10    | 7.14     | 6.83      | 38.65 | 5.43 | 52.17  | 15.02 | 16.36           | 3.28 | 198.14           | 47.11  | 81.84           | 4.48            | 2.52  |
| BH08       | 669.20    | 7.03     | 6.78      | 55.93 | 3.68 | 68.81  | 15.67 | 0.17            | 0.98 | 222.24           | 58.49  | 96.31           | 4.69            | 1.21  |
| BH09       | -         | -        | 6.92      | 42.60 | 2.63 | 69.43  | 16.11 | 0.06            | 1.83 | 206.17           | 48.08  | 96.64           | 18.51           | 3.18  |
| BH10       | -         | -        | 6.97      | 54.48 | 3.55 | 68.75  | 16.48 | 0.75            | 0.82 | 224.92           | 55.61  | 104.17          | 5.37            | 1.34  |
| HH07       | 535.60    | 7.41     | 7.30      | 30.48 | 4.99 | 49.97  | 11.84 | 0.07            | 0.26 | 136.60           | 44.71  | 74.11           | 7.86            | 0.80  |
| HH08       | 539.10    | 7.45     | 7.36      | 29.26 | 4.97 | 51.84  | 11.85 | 0.06            | 0.19 | 123.20           | 44.63  | 75.15           | 19.36           | 6.39  |
| HH10       | 613.50    | 7.44     | 7.35      | 35.48 | 5.38 | 59.62  | 15.96 | 0.07            | 0.36 | 179.40           | 55.33  | 78.19           | 10.89           | 0.43  |
| HH-M       | 474.80    | 7.46     | 7.02      | 27.61 | 4.12 | 54.52  | 11.77 | 0.16            | 0.61 | 133.88           | 40.38  | 73.39           | 11.26           | 0.84  |
| JS23-1     | 778.80    | 6.71     | 7.12      | 50.64 | 5.58 | 83.97  | 25.47 | 1.67            | 0.21 | 246.34           | 75.49  | 78.89           | 89.48           | 1.13  |
| JS23-2     | 546.50    | 6.78     | 7.18      | 33.87 | 5.54 | 55.77  | 17.29 | 4.79            | 0.05 | 176.72           | 45.56  | 77.74           | 36.21           | 1.85  |
| JS25       | 717.80    | 6.68     | 6.85      | 41.73 | 5.93 | 79.11  | 18.21 | 1.77            | 0.08 | 211.53           | 59.81  | 67.95           | 87.86           | 2.41  |
| JS26       | 1033.00   | 6.63     | 6.93      | 62.08 | 6.77 | 114.00 | 27.75 | 0.16            | 0.02 | 257.05           | 96.54  | 142.32          | 100.60          | 0.41  |
| JS27       | 896.40    | 6.69     | 6.92      | 56.25 | 6.03 | 98.00  | 23.79 | 0.29            | 0.07 | 232.95           | 84.28  | 112.48          | 82.16           | 1.00  |
| JS28       | 1033.00   | 6.59     | 6.96      | 67.34 | 5.68 | 112.30 | 26.64 | 0.16            | 0.05 | 281.14           | 104.60 | 112.11          | 100.77          | 0.34  |
| JS29       | 958.30    | 6.52     | 7.01      | 49.22 | 4.92 | 114.20 | 24.70 | 0.31            | 0.22 | 246.34           | 95.83  | 115.07          | 86.08           | 1.09  |

|        |         |      |      |       |      |        |       |       |      |        |        |        |        |      |
|--------|---------|------|------|-------|------|--------|-------|-------|------|--------|--------|--------|--------|------|
| LG02-1 | 638.00  | 6.95 | 6.97 | 46.58 | 3.75 | 63.27  | 13.27 | 0.05  | 0.40 | 187.43 | 48.44  | 89.98  | 24.34  | 1.71 |
| LG03-1 | 619.70  | 6.91 | 7.25 | 48.64 | 5.35 | 59.93  | 12.98 | 3.85  | 4.92 | 208.85 | 48.91  | 86.76  | 30.84  | 1.76 |
| LG04-1 | 646.30  | 6.99 | 6.88 | 47.09 | 3.71 | 63.47  | 13.33 | 2.85  | 0.22 | 198.10 | 48.66  | 89.96  | 26.19  | 1.86 |
| LG05-1 | 789.10  | 6.64 | 6.69 | 45.55 | 2.25 | 93.39  | 17.78 | 0.11  | 0.77 | 136.60 | 89.71  | 102.01 | 108.73 | 2.10 |
| LG06   | -       | -    | 7.01 | 46.85 | 3.74 | 62.65  | 13.39 | 2.75  | 0.16 | 257.05 | 26.38  | 49.02  | 11.84  | 1.83 |
| LG1    | 863.10  | 6.27 | 6.79 | 38.98 | 1.92 | 114.90 | 23.35 | 0.47  | 0.22 | 211.53 | 88.41  | 114.95 | 100.92 | 3.73 |
| LG10-1 | 652.00  | 6.85 | 6.94 | 49.80 | 2.59 | 68.01  | 11.92 | 0.08  | 2.26 | 160.65 | 60.08  | 86.32  | 56.94  | 1.83 |
| LG11-1 | -       | -    | 7.16 | 55.95 | 5.17 | 70.46  | 18.65 | 0.32  | 1.10 | 211.53 | 56.99  | 91.13  | 72.34  | 1.36 |
| LG11-2 | 659.80  | 6.89 | 7.20 | 57.73 | 5.13 | 80.13  | 15.89 | 0.32  | 0.98 | 211.53 | 56.99  | 92.15  | 92.61  | 1.39 |
| LG12-1 | 670.10  | 7.15 | 7.10 | 49.89 | 2.11 | 73.39  | 15.60 | 0.07  | 0.99 | 238.30 | 49.77  | 94.13  | 5.25   | 2.36 |
| LG12-2 | 660.80  | 6.82 | 7.05 | 59.15 | 5.14 | 77.24  | 15.73 | 1.05  | 0.72 | 232.95 | 62.89  | 90.15  | 5.08   | 1.93 |
| LG15   | 640.10  | 7.05 | 7.09 | 45.15 | 3.91 | 56.44  | 13.84 | 4.23  | 0.61 | 208.80 | 45.23  | 90.12  | 3.21   | 2.51 |
| LG18   | 665.70  | 6.83 | 7.05 | 57.85 | 5.34 | 78.48  | 15.93 | 0.37  | 0.42 | 206.17 | 59.47  | 85.97  | 95.64  | 2.39 |
| LG21   | 667.20  | 6.78 | 7.15 | 57.37 | 5.41 | 76.09  | 16.00 | 0.75  | 1.43 | 206.17 | 59.85  | 86.15  | 90.25  | 2.41 |
| LG22   | 606.50  | 6.78 | 7.28 | 56.61 | 4.93 | 69.67  | 12.56 | 0.27  | 0.68 | 198.14 | 60.02  | 87.03  | 5.21   | 1.03 |
| LG220  | -       | -    | 7.29 | 56.13 | 4.78 | 70.87  | 12.15 | 0.28  | 0.38 | 200.82 | 58.80  | 86.01  | 1.77   | 1.07 |
| LG24   | 649.60  | 6.91 | 7.21 | 56.64 | 4.99 | 73.40  | 14.78 | 0.48  | 0.71 | 224.92 | 50.97  | 100.97 | 2.58   | 2.20 |
| LG27   | 788.90  | 6.97 | 6.98 | 42.58 | 6.48 | 79.53  | 18.73 | 15.05 | 0.85 | 369.50 | 52.12  | 50.40  | 5.31   | 2.87 |
| LG28   | 649.20  | 6.93 | 7.12 | 50.02 | 4.88 | 60.86  | 15.82 | 2.63  | 1.58 | 232.95 | 59.21  | 72.18  | 8.55   | 1.05 |
| LG280  | -       | -    | 6.96 | 50.22 | 4.83 | 59.84  | 15.78 | 2.68  | 1.65 | 232.95 | 57.94  | 69.44  | 4.37   | 0.92 |
| LG31   | 661.30  | 7.06 | 7.02 | 55.06 | 6.90 | 69.36  | 17.47 | 3.92  | 0.18 | 224.92 | 62.19  | 67.63  | 60.04  | 1.90 |
| LG32   | 668.20  | 6.96 | 7.03 | 59.04 | 5.70 | 71.05  | 16.80 | 1.61  | 0.30 | 267.76 | 57.86  | 58.13  | 13.09  | 2.83 |
| LG33   | 595.00  | 6.84 | 7.16 | 52.30 | 4.35 | 61.40  | 12.08 | 0.40  | 1.80 | 200.82 | 44.88  | 95.36  | 3.62   | 1.12 |
| LG36   | 621.20  | 7.31 | 7.24 | 39.25 | 4.91 | 48.46  | 13.94 | 17.43 | 1.32 | 246.34 | 41.97  | 52.65  | 4.84   | 4.57 |
| LG37   | 1340.00 | 6.52 | 6.66 | 88.61 | 2.74 | 137.10 | 29.45 | 0.81  | 0.12 | 289.18 | 133.25 | 185.05 | 106.07 | 5.92 |
| LG38   | 1386.00 | 6.46 | 6.82 | 93.97 | 2.34 | 153.70 | 36.72 | 0.74  | 0.20 | 439.12 | 133.79 | 165.89 | 80.59  | 7.58 |

|        |         |      |      |        |       |        |       |       |       |        |        |        |        |      |
|--------|---------|------|------|--------|-------|--------|-------|-------|-------|--------|--------|--------|--------|------|
| LG39   | 1130.00 | 6.52 | 6.80 | 54.47  | 2.22  | 134.20 | 28.08 | 0.48  | 0.34  | 265.08 | 119.55 | 141.53 | 95.65  | 9.48 |
| LG42-2 | 613.20  | 7.07 | 7.17 | 43.64  | 3.67  | 56.62  | 12.35 | 3.24  | 1.70  | 160.70 | 56.13  | 95.09  | 9.55   | 1.86 |
| LG48   | 668.00  | 6.81 | 6.68 | 56.38  | 5.29  | 73.62  | 25.31 | 1.14  | 0.12  | 214.20 | 62.32  | 89.74  | 102.71 | 2.48 |
| LG8-1  | 639.00  | 7.21 | 7.16 | 47.31  | 6.93  | 39.94  | 13.89 | 0.78  | 13.24 | 270.43 | 55.16  | 14.90  | 4.74   | 0.75 |
| LG8-2  | 642.80  | 6.81 | 7.10 | 55.99  | 5.05  | 77.38  | 14.53 | 0.30  | 0.12  | 211.53 | 57.42  | 97.25  | 9.30   | 1.27 |
| MJ01   | 1530.00 | 6.70 | 7.01 | 83.82  | 6.33  | 136.10 | 42.83 | 0.53  | 0.09  | 297.21 | 137.48 | 113.78 | 229.17 | 3.76 |
| MJ02   | 1277.00 | 6.80 | 7.04 | 61.04  | 6.53  | 142.50 | 34.46 | 0.05  | 0.02  | 353.44 | 97.68  | 131.72 | 139.27 | 0.01 |
| MJ03   | 454.90  | 6.33 | 7.06 | 36.57  | 3.76  | 51.13  | 8.48  | 0.30  | 0.11  | 136.56 | 32.04  | 58.54  | 55.41  | 2.54 |
| MJ04   | 638.90  | 7.21 | 7.43 | 48.23  | 3.32  | 60.91  | 11.04 | 1.17  | 0.85  | 179.40 | 51.77  | 95.49  | 4.10   | 0.28 |
| MJ05   | 580.80  | 6.78 | 7.24 | 45.72  | 1.57  | 66.02  | 10.57 | 0.02  | 0.24  | 155.30 | 48.41  | 75.97  | 64.53  | 0.03 |
| MJ06   | 879.70  | 6.71 | 7.20 | 53.23  | 1.21  | 87.45  | 18.99 | 0.02  | 0.07  | 168.69 | 49.62  | 112.08 | 135.39 | 0.01 |
| MJ09   | 1118.00 | 6.42 | 6.62 | 51.28  | 2.58  | 129.20 | 34.21 | 0.06  | 0.08  | 136.56 | 148.61 | 153.45 | 150.63 | 0.09 |
| MJ10   | 1254.00 | 6.77 | 7.16 | 68.40  | 4.42  | 126.70 | 31.76 | 0.10  | 0.30  | 227.59 | 122.56 | 127.12 | 178.37 | 1.04 |
| MJ11   | 1480.00 | 6.58 | 7.12 | 72.45  | 7.72  | 154.70 | 40.06 | 0.16  | 0.04  | 93.71  | 127.70 | 219.57 | 338.24 | 2.15 |
| MJ14   | 1472.00 | 6.56 | 7.00 | 97.62  | 7.06  | 123.70 | 40.14 | 5.84  | 2.00  | 350.76 | 159.15 | 189.19 | 63.14  | 5.28 |
| MJ140  | -       | -    | 6.92 | 95.49  | 7.20  | 122.20 | 40.44 | 5.96  | 2.24  | 356.12 | 159.57 | 178.74 | 63.91  | 5.78 |
| MJ15   | 1882.00 | 7.06 | 6.98 | 132.10 | 18.05 | 135.20 | 48.60 | 14.46 | 0.07  | 500.70 | 168.70 | 220.51 | 80.58  | 3.04 |
| MJ16   | 1693.00 | 7.02 | 7.23 | 110.10 | 16.70 | 95.32  | 33.52 | 3.08  | 0.13  | 527.50 | 154.59 | 28.56  | 6.23   | 0.42 |
| MJ17   | 1373.00 | 6.45 | 6.68 | 87.15  | 6.40  | 120.70 | 44.07 | 0.15  | 0.03  | 291.85 | 122.33 | 189.18 | 136.07 | 1.90 |
| MJ18   | 992.00  | 6.48 | 6.64 | 58.93  | 3.58  | 105.00 | 26.22 | 0.40  | 0.04  | 163.33 | 115.92 | 120.32 | 136.65 | 3.82 |
| MJ19   | 641.60  | 6.15 | 6.89 | 55.27  | 4.26  | 62.41  | 14.61 | 0.73  | 0.20  | 123.17 | 52.94  | 98.97  | 98.03  | 1.48 |
| MJ20   | 1430.00 | 6.62 | 7.14 | 90.49  | 3.74  | 141.70 | 33.41 | 0.03  | 0.07  | 160.65 | 150.00 | 185.21 | 236.96 | 0.13 |
| MJ21   | 1481.00 | 6.48 | 6.86 | 97.39  | 4.35  | 150.90 | 45.29 | 0.05  | 1.68  | 187.43 | 183.41 | 177.63 | 288.60 | 6.30 |
| MJ22   | 1145.00 | 6.99 | 7.18 | 48.99  | 6.90  | 134.70 | 33.51 | 7.25  | 0.47  | 554.30 | 59.92  | 64.32  | 19.55  | 0.54 |
| MJ220  | -       | -    | 7.19 | 49.12  | 6.97  | 132.00 | 32.85 | 8.67  | 0.52  | 581.00 | 58.99  | 63.54  | 14.61  | 0.59 |
| MJ25   | 1331.00 | 6.71 | 6.85 | 73.71  | 5.28  | 150.60 | 49.10 | 0.09  | 2.17  | 275.79 | 139.51 | 329.28 | 7.79   | 1.37 |

|      |         |      |      |        |       |        |       |       |       |        |        |        |        |      |
|------|---------|------|------|--------|-------|--------|-------|-------|-------|--------|--------|--------|--------|------|
| ML12 | 1499.00 | 6.50 | 6.70 | 109.40 | 2.96  | 147.10 | 34.18 | 0.04  | 0.05  | 216.88 | 174.13 | 217.62 | 179.01 | 0.05 |
| WS01 | 603.60  | 7.47 | 7.59 | 45.76  | 5.68  | 52.03  | 21.64 | 0.17  | 0.28  | 155.30 | 60.01  | 78.18  | 65.82  | 0.15 |
| WS02 | 476.00  | 7.16 | 7.66 | 36.11  | 3.85  | 48.17  | 15.31 | 0.43  | 0.02  | 149.94 | 37.24  | 48.48  | 69.01  | 0.08 |
| XH04 | 1077.00 | 7.23 | 7.32 | 100.30 | 8.33  | 71.48  | 15.61 | 14.33 | 1.29  | 222.20 | 165.15 | 96.25  | 31.60  | 1.41 |
| XH05 | 1399.00 | 7.53 | 7.39 | 141.80 | 8.09  | 73.35  | 15.05 | 11.22 | 0.43  | 257.05 | 157.00 | 104.94 | 107.45 | 0.47 |
| ZK01 | 2871.00 | 6.62 | 6.80 | 122.00 | 40.41 | 270.20 | 52.64 | 17.53 | 11.79 | 436.44 | 287.62 | 500.32 | 101.05 | 8.49 |
| ZK02 | 1575.00 | 6.22 | 6.76 | 87.60  | 3.76  | 157.80 | 49.14 | 0.09  | 0.18  | 176.72 | 181.19 | 171.54 | 315.62 | 1.27 |
| ZK03 | 1203.00 | 6.41 | 7.05 | 79.52  | 2.54  | 110.80 | 26.91 | 0.05  | 0.23  | 157.98 | 101.94 | 157.42 | 201.18 | 0.04 |
| ZK04 | 643.20  | 6.97 | 7.20 | 51.00  | 3.72  | 60.10  | 14.74 | 1.76  | 0.13  | 208.80 | 62.06  | 83.75  | 4.75   | 1.83 |
| ZK05 | 658.80  | 6.98 | 7.36 | 59.71  | 2.72  | 60.95  | 11.77 | 0.06  | 0.03  | 224.92 | 49.28  | 86.59  | 3.52   | 0.02 |
| ZK07 | -       | -    | 7.02 | 81.67  | 2.75  | 105.80 | 35.92 | 0.06  | 0.19  | 160.65 | 124.07 | 158.76 | 185.73 | 0.03 |

**Table S3  $\delta^{18}\text{O}_{\text{water}}$  (‰) and  $\delta^2\text{H}_{\text{water}}$  (‰) values of Groundwater and River water in the study area (June)**

| Point Name | $\delta^{18}\text{O}$ (‰) | $\delta^2\text{H}$ (‰) | Point Name | $\delta^{18}\text{O}$ (‰) | $\delta^2\text{H}$ (‰) | Point Name | $\delta^{18}\text{O}$ (‰) | $\delta^2\text{H}$ (‰) |
|------------|---------------------------|------------------------|------------|---------------------------|------------------------|------------|---------------------------|------------------------|
| MJ04       | -9.14                     | -65.87                 | BH01       | -8.91                     | -65.67                 | HH-M       | -9.21                     | -65.7                  |
| MJ22       | -9.18                     | -66.39                 | BH02       | -9.04                     | -65.16                 | HH-D       | -9.14                     | -66.92                 |
| MJ19       | -9.56                     | -68.23                 | BH04       | -9.66                     | -69.71                 | HH-U       | -9.39                     | -66.27                 |
| MJ02       | -8.98                     | -65.05                 | BH04-C     | -9.73                     | -70.24                 | WS02       | -9.02                     | -66.36                 |
| WS01       | -8.02                     | -61.55                 | BH04-B     | -9.56                     | -69.35                 | XH04       | -8.9                      | -64.3                  |
| MJ09       | -7.82                     | -58.77                 | BH05       | -9.03                     | -65.8                  | Rain2      | -7.59                     | -52.44                 |
| MJ25       | -8.7                      | -63.66                 | LG15       | -8.95                     | -65.34                 | JS28       | -8.89                     | -64.61                 |
| MJ20       | -9.09                     | -64.04                 | LG31       | -8.98                     | -66.45                 | JS29       | -8.64                     | -63.55                 |
| MJ12       | -8.4                      | -62.45                 | LG29       | -9.2                      | -66.96                 | LG18       | -8.69                     | -64.98                 |
| MJ16       | -8.64                     | -63.37                 | LG36       | -9.5                      | -67.94                 | LG11-2     | -8.76                     | -64.82                 |
| MJ01       | -8.56                     | -62.26                 | ZK04       | -9.12                     | -66.78                 | LG10-1     | -8.82                     | -65.66                 |

|        |       |        |        |       |        |        |       |        |
|--------|-------|--------|--------|-------|--------|--------|-------|--------|
| LG38   | -8.28 | -62.05 | JS23-2 | -9.42 | -68.34 | LG02-1 | -8.89 | -66.17 |
| ZK01   | -8.51 | -63.02 | LG08-1 | -9.15 | -67.84 | LG05-1 | -8.32 | -62.93 |
| LG03-1 | -8.96 | -65.31 | LG48   | -8.81 | -65.02 | LG04-1 | -8.86 | -65.91 |
| ZK05   | -8.49 | -63.45 |        |       |        |        |       |        |

**Table S4  $\delta^{18}\text{O}_{\text{water}}$  (‰) and  $\delta^2\text{H}_{\text{water}}$  (‰) values of Groundwater and River water in the study area (September)**

| Point Name | $\delta^{18}\text{O}$ (‰) | $\delta^2\text{H}$ (‰) | Point Name | $\delta^{18}\text{O}$ (‰) | $\delta^2\text{H}$ (‰) | Point Name | $\delta^{18}\text{O}$ (‰) | $\delta^2\text{H}$ (‰) |
|------------|---------------------------|------------------------|------------|---------------------------|------------------------|------------|---------------------------|------------------------|
| MJ01       | -8.24                     | -61.2                  | BH03       | -10.19                    | -75.2                  | HH01       | -9.79                     | -72.3                  |
| MJ09       | -7.56                     | -58.1                  | BH04       | -13.85                    | -103.2                 | HH02       | -9.87                     | -71.9                  |
| MJ10       | -8.89                     | -64.4                  | BH05       | -9.13                     | -68.3                  | SK01       | -7.9                      | -68.3                  |
| MJ12       | -8.8                      | -63.3                  | JS23-1     | -8.8                      | -64.9                  | WS01       | -8.7                      | -65.7                  |
| MJ18       | -8.16                     | -60.9                  | JS25       | -8.91                     | -65.9                  | WS02       | -8.43                     | -64.3                  |
| MJ20       | -9.13                     | -65.4                  | JS26       | -9.38                     | -66.4                  | XH01       | -9.37                     | -69.2                  |
| MJ25       | -8.6                      | -63                    | JS27       | -9.23                     | -66                    | XH02       | -9.14                     | -67.6                  |
| MJ30       | -7.67                     | -58.5                  | LG02-1     | -8.72                     | -64.6                  | Rain       | -8.32                     | -54.9                  |
| MJ31       | -8.05                     | -62.7                  | LG03       | -8.65                     | -64.6                  | MJ41       | -8.77                     | -65                    |
| MJ32       | -9.09                     | -66.4                  | LG04-1     | -8.89                     | -66.7                  | MJ43       | -10.71                    | -79.2                  |
| MJ33       | -9.19                     | -67.6                  | LG05-2     | -6.9                      | -55.3                  | MJ44       | -9.32                     | -67.3                  |
| MJ34       | -8.45                     | -62                    | LG10       | -8.38                     | -63.2                  | MJ45       | -9.12                     | -66.9                  |
| MJ35       | -8.04                     | -61.3                  | LG12       | -8.84                     | -64                    | LG36       | -8.92                     | -65.7                  |
| MJ36       | -8.73                     | -62.9                  | LG12-1     | -8.44                     | -63.1                  | LG37       | -8.27                     | -62                    |
| MJ37       | -9.2                      | -66.3                  | LG12-2     | -8.37                     | -62.6                  | LG38       | -8.11                     | -61.8                  |
| MJ38       | -8.98                     | -66.5                  | LG24       | -8.46                     | -63.6                  | LG40       | -8.55                     | -62.7                  |
| MJ39       | -8.93                     | -66.3                  | LG31       | -8.75                     | -65.8                  | LG42-2     | -8.88                     | -66                    |
| MJ40       | -9.17                     | -67.7                  | LG32       | -8.21                     | -62.9                  | LG48       | -8.45                     | -64.6                  |



**Table S5  $\delta^{18}\text{O}_{\text{nitrate}}$  (‰) and  $\delta^{15}\text{N}_{\text{nitrate}}$  (‰) values of Groundwater and River water in the study area (June)**

| Point Name | $\delta^{15}\text{N}$ (‰) | $\delta^{18}\text{O}$ (‰) | Point Name | $\delta^{15}\text{N}$ (‰) | $\delta^{18}\text{O}$ (‰) |
|------------|---------------------------|---------------------------|------------|---------------------------|---------------------------|
| ZK02       | 11.05                     | 8.59                      | MJ21       | 11.11                     | 14.08                     |
| ZK01       | 3.75                      | 10.97                     | MJ01       | 9.15                      | 12.43                     |
| ZK04       | -2.73                     | 7.36                      | MJ04       | -2.63                     | 12.52                     |
| ZK03       | 9.36                      | 9.16                      | MJ11       | 9.3                       | 11.21                     |
| ZK05       | 0.3                       | 11.75                     | MJ20       | 7.05                      | 10.86                     |
| BH07       | -2.46                     | 11.27                     | MJ06       | 4.44                      | 10.25                     |
| BH05       | -3.14                     | 8.71                      | LG02-1     | 6.41                      | 11.86                     |
| MJ18       | 11.84                     | 8.12                      | LG04-1     | 3.79                      | 8.04                      |
| MJ09       | 9.19                      | 9.86                      | LG3-1      | 9.25                      | 12.31                     |
| MJ19       | 7.45                      | 9.81                      | LG06       | 1.58                      | 10.69                     |
| MJ12       | 8.41                      | 11.07                     | LG05-1     | 13.22                     | 11.03                     |
| MJ10       | 7.54                      | 12.68                     | LG18       | 5.46                      | 12.11                     |
| MJ17       | 12.64                     | 13.29                     | HH-M       | 3.87                      | 15.96                     |
| MJ02       | 9.18                      | 12.58                     | XH04       | 2.63                      | 10.13                     |

**Table S6  $\delta^{18}\text{O}_{\text{nitrate}}$  (‰) and  $\delta^{15}\text{N}_{\text{nitrate}}$  (‰) values of Groundwater and River water in the study area (September)**

| Point Name | $\delta^{18}\text{O}$ (‰) | $\delta^{15}\text{N}$ (‰) | Point Name | $\delta^{18}\text{O}$ (‰) | $\delta^{15}\text{N}$ (‰) | Point Name | $\delta^{18}\text{O}$ (‰) | $\delta^{15}\text{N}$ (‰) |
|------------|---------------------------|---------------------------|------------|---------------------------|---------------------------|------------|---------------------------|---------------------------|
| MJ01       | 16.54                     | 12.62                     | JS25       | 18.61                     | 14.45                     | HH01       | 7.26                      | -10.36                    |
| MJ08       | 9.61                      | 8.28                      | JS26       | 10.07                     | 2.22                      | HH-M       | 7.10                      | 4.85                      |
| MJ10       | 9.21                      | 7.59                      | JS27       | 8.12                      | 6.45                      | WS02       | 12.54                     | 1.42                      |
| MJ12       | 8.42                      | 4.51                      | LG02-1     | 4.06                      | 7.48                      | XH01       | 4.66                      | 4.85                      |
| MJ18       | 21.39                     | 12.51                     | LG03       | -7.26                     | 7.36                      | XH02       | 3.80                      | 13.31                     |
| MJ20       | 7.99                      | -0.07                     | LG04-1     | -1.22                     | 8.74                      | MJ41       | 9.70                      | -12.87                    |

|      |       |       |        |       |       |      |       |        |
|------|-------|-------|--------|-------|-------|------|-------|--------|
| MJ25 | 8.81  | 4.51  | LG05   | 12.38 | 8.85  | MJ42 | 10.27 | 1.88   |
| MJ30 | 9.04  | 6.22  | LG10   | 6.37  | 9.54  | MJ44 | 11.75 | -18.36 |
| MJ31 | 5.55  | 8.05  | LG12-1 | 13.57 | 8.85  | MJ36 | 10.83 | -0.75  |
| MJ32 | 7.46  | 7.82  | LG37   | 16.54 | 8.05  | LG40 | 11.45 | 7.02   |
| MJ33 | -6.00 | -0.41 | LG38   | 20.36 | 15.02 |      |       |        |
| MJ35 | 24.85 | 1.08  | LG39   | 17.20 | 10.68 |      |       |        |

**Table S7 The  $\delta^{15}\text{N}_{\text{nitrate}}$  and  $\delta^{18}\text{O}_{\text{nitrate}}$  values for soil samples**

| <b>Point Name</b> | <b><math>\delta^{15}\text{N}(\text{‰})</math></b> | <b><math>\delta^{18}\text{O}(\text{‰})</math></b> | <b>Point Name</b> | <b><math>\delta^{15}\text{N}(\text{‰})</math></b> | <b><math>\delta^{18}\text{O}(\text{‰})</math></b> |
|-------------------|---------------------------------------------------|---------------------------------------------------|-------------------|---------------------------------------------------|---------------------------------------------------|
| TY03-2            | 1.68                                              | 7.43                                              | XZ02              | 0.62                                              | 10.98                                             |
| TY02              | 0.76                                              | -4.81                                             | TY10              | 5.08                                              | -0.17                                             |
| TY05              | 3.68                                              | -0.96                                             | XZ01              | -0.93                                             | -2.34                                             |
| TY01              | 6.71                                              | -5.99                                             | TY07              | 12.6                                              | 11.47                                             |
| TY04              | 7.57                                              | 13.94                                             | TY11              | 4.59                                              | -6.39                                             |
| TY06              | 0.39                                              | 22.13                                             | XZ07              | 5.68                                              | 16.9                                              |
| XZ04-2            | 4.99                                              | 16.01                                             |                   |                                                   |                                                   |
